# Supplementary material for: Versatile Solid Modifications of Multicomponent Pharmaceutical Salts: Novel Metformin–Rhein Salts Based on Advantage Complementary Strategy Design
Source: MDPI journal article supplement (doi:10.3390/pharmaceutics15041196), 2023-04-09
Supplement: s1 [file s1]

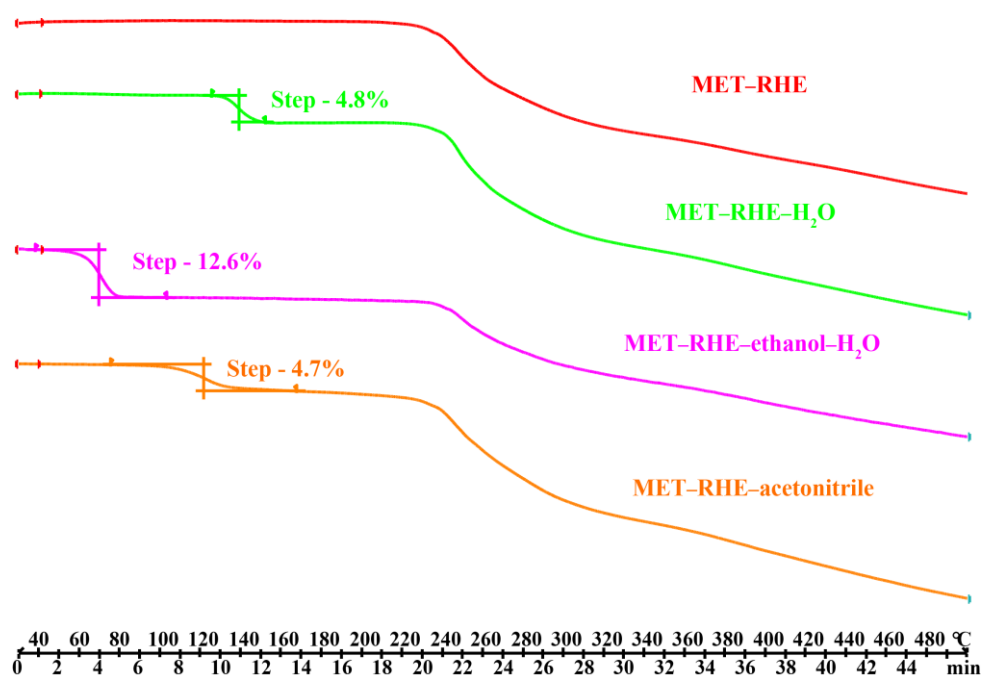

**Figure S1.** TG profiles of MET-RHE, MET-RHE-H<sub>2</sub>O, MET-RHE-ethanol-H<sub>2</sub>O, MET-RHE-acetonitrile.

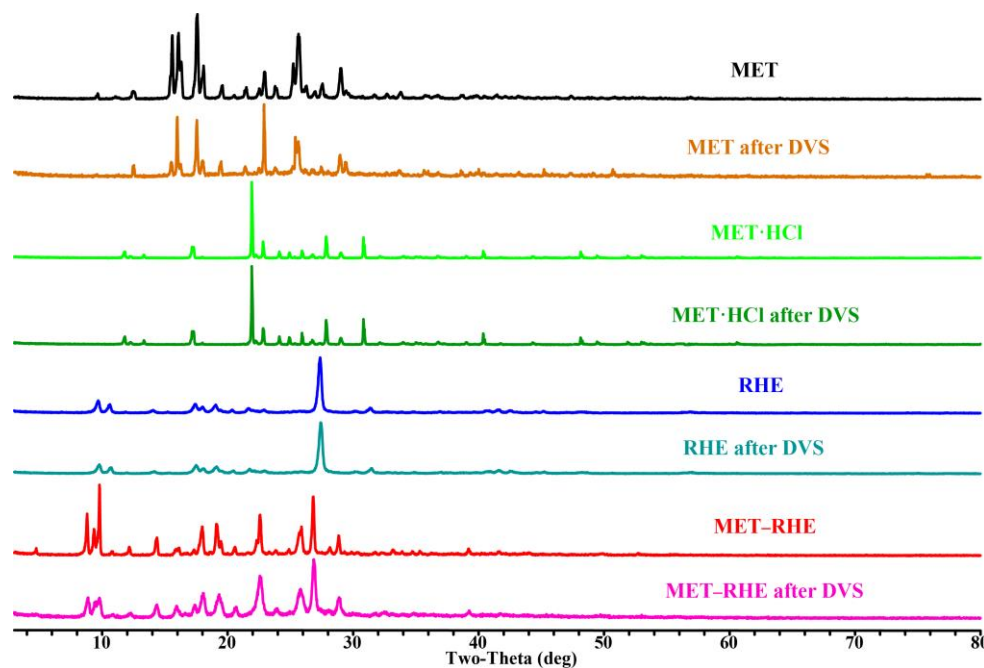

**Figure S2.** The PXRD patterns of samples after DVS experiments

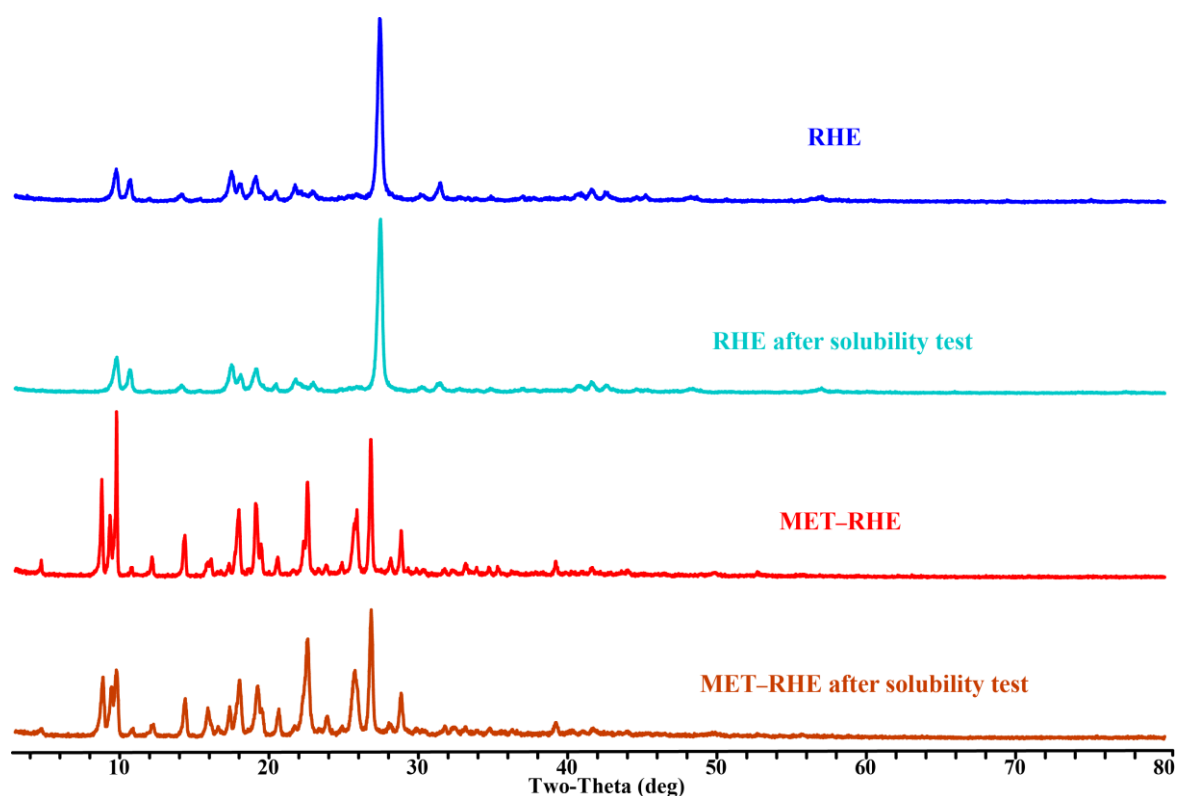

Figure S3. The PXRD patterns of samples after solubility tests

Table S1. Weight loss steps of solvents in the TG curves of A, B and C compared with theoretical weight loss percentage.

| Sample                           | Actual Weight Loss (%) | Theoretical Weight Loss (%) |
|----------------------------------|------------------------|-----------------------------|
| MET-RHE-H <sub>2</sub> O         | 4.8                    | 4.2                         |
| MET-RHE-ethanol-H <sub>2</sub> O | 12.6                   | 13.4                        |
| MET-RHE-acetonitrile             | 4.7                    | 4.7                         |

Table S2. Detailed hydrogen bonding information of MET-RHE.

| D-H...A (Å)                                                    | d(D-H) (Å) | d(H...A) (Å) | d(D...A) (Å) | ∠D-H...A (deg) |
|----------------------------------------------------------------|------------|--------------|--------------|----------------|
| O <sub>3</sub> -H <sub>3</sub> ...O <sub>4</sub>               | 0.82       | 1.90         | 2.60         | 143.92         |
| O <sub>3</sub> -H <sub>3</sub> ...O <sub>5</sub> <sup>a</sup>  | 0.82       | 2.60         | 3.23         | 133.77         |
| O <sub>5</sub> -H <sub>5</sub> ...O <sub>4</sub>               | 0.82       | 1.89         | 2.61         | 145.33         |
| O <sub>5</sub> -H <sub>5</sub> ...O <sub>4</sub> <sup>b</sup>  | 0.82       | 2.50         | 2.99         | 119.37         |
| N <sub>2</sub> -H <sub>2A</sub> ...O <sub>2</sub> <sup>c</sup> | 0.86       | 2.16         | 2.92         | 147.49         |
| N <sub>2</sub> -H <sub>2B</sub> ...O <sub>2</sub> <sup>d</sup> | 0.86       | 2.24         | 2.98         | 144.19         |
| N <sub>2</sub> -H <sub>2B</sub> ...N <sub>4</sub>              | 0.86       | 2.38         | 2.86         | 115.64         |
| N <sub>3</sub> -H <sub>3B</sub> ...N <sub>5</sub> <sup>e</sup> | 0.86       | 2.34         | 3.01         | 135.48         |
| N <sub>4</sub> -H <sub>4A</sub> ...O <sub>2</sub> <sup>f</sup> | 0.86       | 2.20         | 2.89         | 137.08         |
| N <sub>4</sub> -H <sub>4A</sub> ...N <sub>2</sub>              | 0.86       | 2.41         | 2.86         | 112.35         |
| N <sub>4</sub> -H <sub>4B</sub> ...O <sub>1</sub>              | 0.86       | 2.17         | 2.93         | 145.94         |
| N <sub>5</sub> -H <sub>5A</sub> ...O <sub>1</sub>              | 0.99       | 1.83         | 2.77         | 156.83         |

Symmetry codes: (a) -x+3, -y+1, -z (b) -x+3, -y+1, -z (c) -x, -y+1, -z+1 (d) x-1, y, z (e) -x, -y+2, -z+1 (f) -x+1, -y+1, -z+1.

**Table S3.** Detailed hydrogen bonding information of MET–RHE–ethanol–H<sub>2</sub>O.

| D–H···A (Å)                                                    | d(D–H) (Å) | d(H···A) (Å) | d(D···A) (Å) | ∠D–H···A (deg) |
|----------------------------------------------------------------|------------|--------------|--------------|----------------|
| O <sub>3</sub> –H <sub>3</sub> ···O <sub>4</sub>               | 0.84       | 1.86         | 2.58         | 144.02         |
| O <sub>3</sub> –H <sub>3</sub> ···O <sub>4</sub> <sup>a</sup>  | 0.84       | 2.47         | 2.88         | 110.80         |
| O <sub>5</sub> –H <sub>5</sub> ···O <sub>4</sub>               | 0.84       | 1.85         | 2.59         | 145.13         |
| O <sub>5</sub> –H <sub>5</sub> ···O <sub>3</sub> <sup>b</sup>  | 0.84       | 2.65         | 3.29         | 134.44         |
| N <sub>5</sub> –H <sub>5A</sub> ···O <sub>1</sub>              | 0.88       | 2.11         | 2.91         | 151.32         |
| N <sub>5</sub> –H <sub>5B</sub> ···N <sub>3</sub> <sup>c</sup> | 0.88       | 2.20         | 3.08         | 174.13         |
| N <sub>4</sub> –H <sub>4A</sub> ···O <sub>7</sub>              | 0.88       | 2.12         | 2.96         | 159.47         |
| N <sub>4</sub> –H <sub>4B</sub> ···O <sub>7</sub> <sup>d</sup> | 0.88       | 2.10         | 2.88         | 147.47         |
| N <sub>2</sub> –H <sub>2A</sub> ···O <sub>8</sub> <sup>e</sup> | 0.88       | 2.22         | 2.92         | 136.78         |
| N <sub>2</sub> –H <sub>2B</sub> ···O <sub>1</sub> <sup>f</sup> | 0.88       | 2.19         | 2.89         | 137.07         |
| O <sub>7</sub> –H <sub>7A</sub> ···O <sub>2</sub>              | 0.84       | 1.80         | 2.64         | 173.09         |
| O <sub>8</sub> –H <sub>8A</sub> ···O <sub>6</sub>              | 0.86       | 2.07         | 2.92         | 176.41         |
| O <sub>8</sub> –H <sub>8B</sub> ···O <sub>2</sub> <sup>g</sup> | 0.85       | 0.98         | 2.82         | 169.88         |

Symmetry codes: (a) -x+1, -y, -z (b) -x+1, -y, -z (c) -x+1, -y+1, -z-1 (d) -x, -y, -z-1 (e) -x, -y+1, -z-1 (f) -x, -y+1, -z-1 (g) x, y+1, z.

**Table S4.** Detailed hydrogen bonding information of MET–RHE–acetonitrile.

| D–H···A (Å)                                                       | d(D–H) (Å) | d(H···A) (Å) | d(D···A) (Å) | ∠D–H···A (deg) |
|-------------------------------------------------------------------|------------|--------------|--------------|----------------|
| O <sub>1B</sub> –H <sub>1B</sub> ···O <sub>4B</sub>               | 0.82       | 1.87         | 2.59         | 144.87         |
| O <sub>1B</sub> –H <sub>1B</sub> ···O <sub>4A</sub> <sup>a</sup>  | 0.82       | 2.37         | 2.86         | 118.83         |
| O <sub>1A</sub> –H <sub>1A</sub> ···O <sub>4B</sub> <sup>b</sup>  | 0.82       | 2.36         | 2.84         | 118.38         |
| O <sub>1A</sub> –H <sub>1A</sub> ···O <sub>4A</sub>               | 0.82       | 1.87         | 2.58         | 145.30         |
| O <sub>3B</sub> –H <sub>3B</sub> ···O <sub>4B</sub>               | 0.82       | 1.89         | 2.60         | 144.37         |
| O <sub>3B</sub> –H <sub>3B</sub> ···O <sub>1A</sub> <sup>c</sup>  | 0.82       | 2.48         | 3.11         | 134.85         |
| N <sub>4B</sub> –H <sub>4BA</sub> ···O <sub>5A</sub> <sup>d</sup> | 0.86       | 2.18         | 2.99         | 155.89         |
| N <sub>4B</sub> –H <sub>4BB</sub> ···N <sub>2B</sub>              | 0.86       | 2.47         | 2.89         | 111.31         |
| N <sub>4B</sub> –H <sub>4BB</sub> ···N <sub>1Y</sub> <sup>e</sup> | 0.86       | 2.37         | 3.06         | 137.90         |
| N <sub>2B</sub> –H <sub>2BA</sub> ···O <sub>6B</sub> <sup>f</sup> | 0.86       | 2.18         | 3.03         | 171.95         |
| N <sub>2B</sub> –H <sub>2BB</sub> ···O <sub>6B</sub>              | 0.86       | 2.21         | 2.90         | 137.70         |
| N <sub>2B</sub> –H <sub>2BB</sub> ···N <sub>4B</sub>              | 0.86       | 2.47         | 2.89         | 110.96         |
| N <sub>1A</sub> –H <sub>1AA</sub> ···O <sub>5B</sub>              | 0.86       | 2.29         | 3.04         | 146.16         |
| N <sub>1A</sub> –H <sub>1AB</sub> ···O <sub>6A</sub> <sup>g</sup> | 0.86       | 2.02         | 2.82         | 152.75         |
| O <sub>3A</sub> –H <sub>3A</sub> ···O <sub>1B</sub> <sup>h</sup>  | 0.82       | 2.49         | 3.12         | 135.20         |
| O <sub>3A</sub> –H <sub>3A</sub> ···O <sub>4A</sub>               | 0.82       | 1.88         | 2.59         | 143.38         |
| N <sub>1B</sub> –H <sub>1BA</sub> ···O <sub>6A</sub> <sup>i</sup> | 0.86       | 2.06         | 2.83         | 148.75         |
| N <sub>1B</sub> –H <sub>1BB</sub> ···O <sub>5B</sub> <sup>j</sup> | 0.86       | 2.12         | 2.90         | 151.21         |
| N <sub>2A</sub> –H <sub>2AA</sub> ···O <sub>5B</sub> <sup>k</sup> | 0.86       | 2.54         | 3.18         | 132.31         |
| N <sub>2A</sub> –H <sub>2AA</sub> ···N <sub>4A</sub>              | 0.86       | 2.47         | 2.89         | 110.79         |
| N <sub>2A</sub> –H <sub>2AB</sub> ···O <sub>5A</sub> <sup>l</sup> | 0.86       | 2.11         | 2.95         | 167.25         |
| N <sub>4A</sub> –H <sub>4AA</sub> ···O <sub>6B</sub> <sup>m</sup> | 0.86       | 2.22         | 3.02         | 153.76         |
| N <sub>4A</sub> –H <sub>4AB</sub> ···O <sub>2A</sub>              | 0.86       | 2.43         | 2.89         | 113.64         |
| N <sub>4A</sub> –H <sub>4AB</sub> ···N <sub>1Y</sub>              | 0.86       | 2.62         | 3.19         | 125.55         |

Symmetry codes: (a) x, -y+3/2, z+1/2 (b) x, -y+3/2, z-1/2 (c) x, -y+3/2, z+1/2 (d) -x+1, y-1/2, -z+1/2 (e) -x, y-1/2, -z+1/2 (f) -x, -y+1, -z (g) x-1, y, z (h) x, -y+3/2, z-1/2 (i) -x+1, -y+1, -z (j) -x, -y+1, -z (k) -x, y+1/2, -z+1/2 (l) x-1, y, z (m) x, -y+3/2, z+1/2.

**Table S5.** The DVS data of MET, MET·HCl, MET·RHE

| Target RH (%) | Change in Mass (%) |         |         |
|---------------|--------------------|---------|---------|
|               | MET                | MET·RHE | MET·HCl |
| 20            | 0.00               | 0.00    | 0.00    |
| 25            | 0.02               | 0.04    | 0.00    |
| 30            | 0.04               | 0.09    | 0.00    |
| 35            | 0.05               | 0.14    | 0.01    |
| 40            | 0.07               | 0.20    | 0.01    |
| 45            | 0.09               | 0.26    | 0.01    |
| 50            | 0.13               | 0.34    | 0.02    |
| 55            | 0.23               | 0.44    | 0.02    |
| 60            | 0.45               | 0.57    | 0.02    |
| 65            | 0.97               | 0.71    | 0.03    |
| 70            | 1.67               | 0.86    | 0.04    |
| 75            | 4.06               | 1.04    | 0.05    |
| 80            | 9.59               | 1.28    | 0.06    |
| 85            | 18.49              | 1.61    | 0.08    |
| 90            | 31.79              | 2.03    | 0.11    |
| 95            | 49.41              | 2.66    | 0.17    |
| 90            | 60.50              | 2.41    | 0.11    |
| 85            | 64.68              | 1.72    | 0.08    |
| 80            | 64.48              | 1.37    | 0.06    |
| 75            | 59.09              | 1.15    | 0.05    |
| 70            | 51.50              | 0.99    | 0.04    |
| 65            | 43.17              | 0.87    | 0.04    |
| 60            | 35.20              | 0.77    | 0.03    |
| 55            | 27.05              | 0.58    | 0.02    |
| 50            | 18.04              | 0.60    | 0.02    |
| 45            | 11.92              | 0.52    | 0.01    |
| 40            | 10.71              | 0.44    | 0.01    |
| 35            | 10.34              | 0.36    | 0.01    |
| 30            | 10.05              | 0.28    | 0.01    |
| 25            | 9.84               | 0.22    | 0.00    |
| 20            | 9.66               | 0.15    | 0.00    |
